# Supplementary material for: Measurement of Conditional Relatedness Between Genes Using Fully Convolutional Neural Network
Source: PubMed Central journal article supplement (PMC6818468; doi:10.3389/fgene.2019.01009), 2019-10-22
Supplement: Image_1.pdf [file Image_1.pdf]

## Supplementary Material

### 1 Supplementary Figures

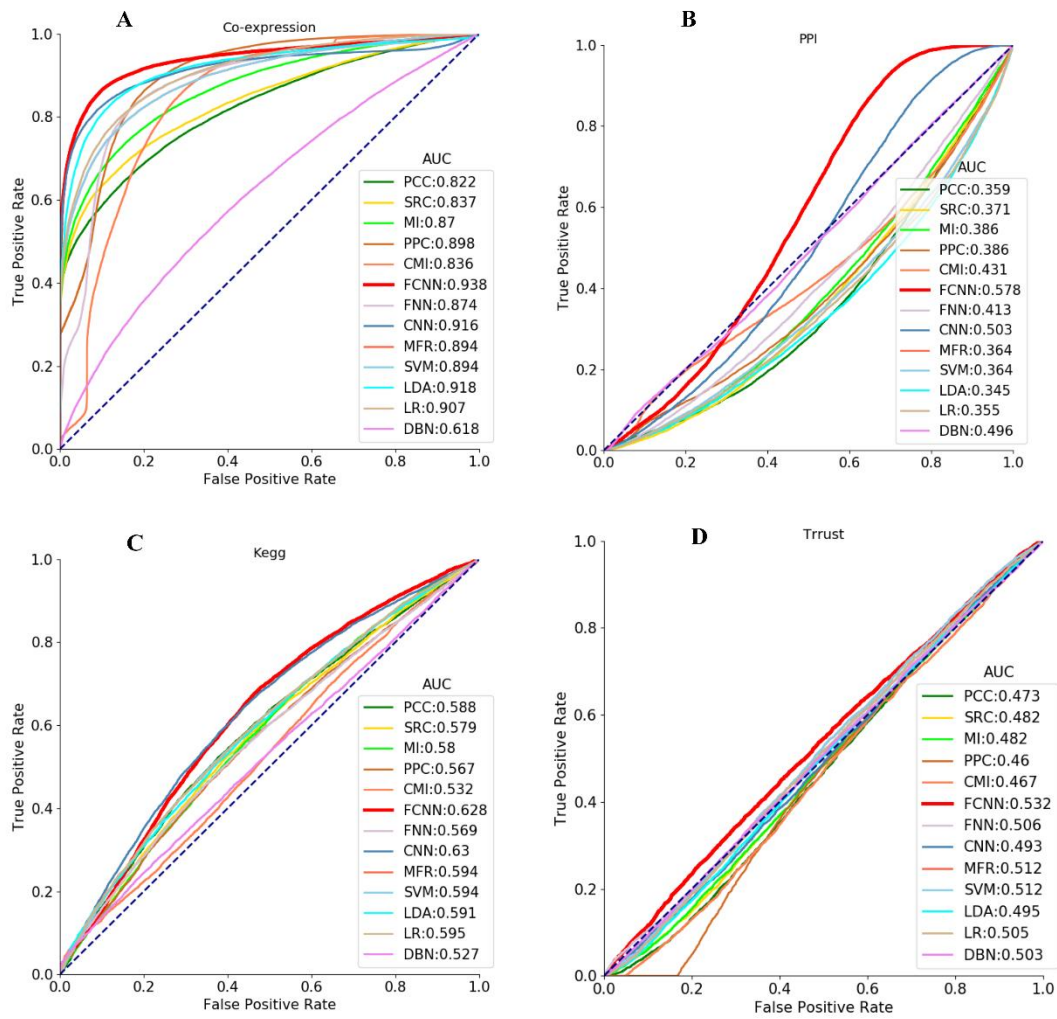

Figure S1. The ROCs of all models and methods on (A) co-expression, (B) PPI, (C) KEGG and (D) TRRUST sub-sub datasets.
